# Supplementary material for: Peanut AhmTERF1 Regulates Root Growth by Modulating Mitochondrial Abundance
Source: MDPI journal article supplement (doi:10.3390/genes14010209), 2023-01-13
Supplement: s1 [file s1]

Supplemental Data

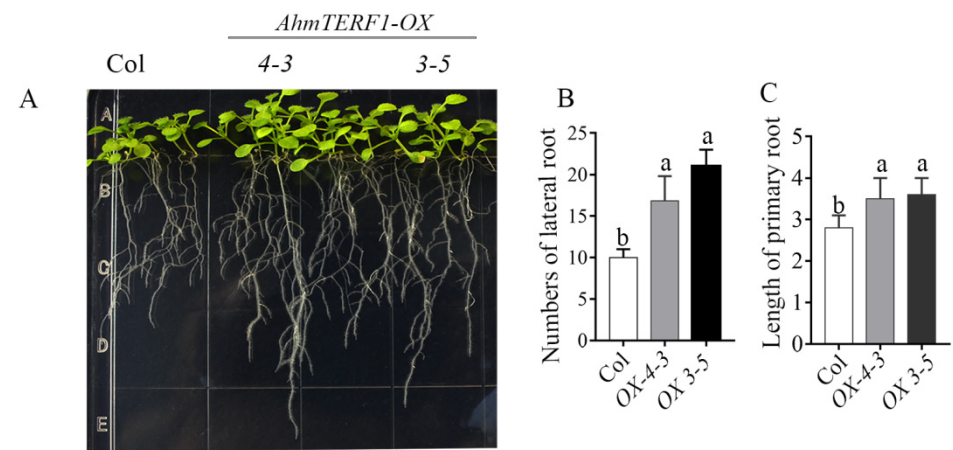

Supplemental Figure S1 *AhmTERF1* promotes root growth in *Arabidopsis*.

A: Phenotype of 7 d-old of Col and *AhmTERF1-OX* *Arabidopsis* lines grown on 1/2 MS medium. B and C: Number of lateral roots and length of primary roots of plants shown in A. Lower case letters (a, b) indicate significantly different groups ( $P < 0.05$ ).

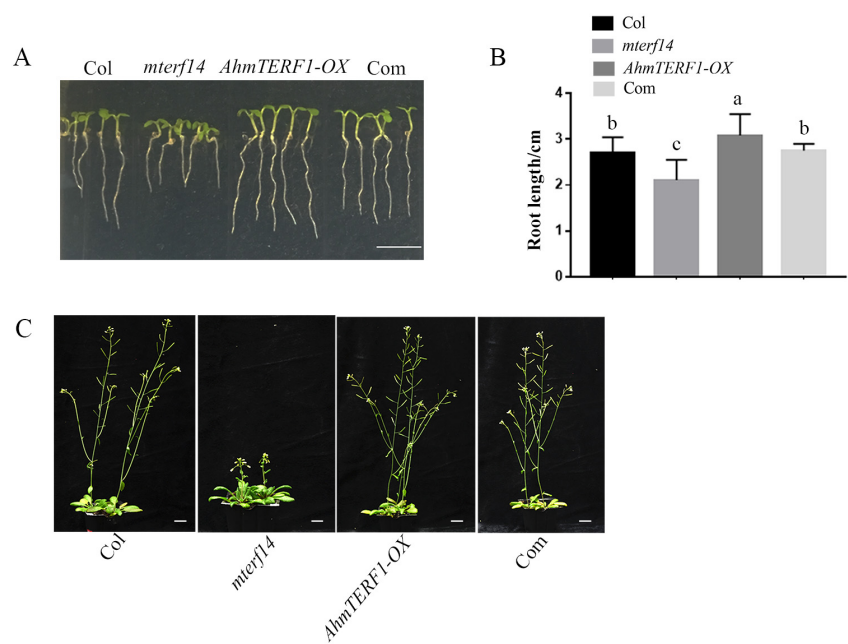

Supplemental Figure S2 *AhmTERF1* restores the phenotype of *mterf14* in *Arabidopsis*. A: Phenotype of 3 d-old *AhmTERF1* transgenic *Arabidopsis* seedlings grown on 1/2 MS medium. Scale bar: 1 cm. B: Length of roots from specimens in A. C: Phenotype of *AhmTERF1* transgenic *Arabidopsis* plants at the flowering stage. Scale bars: 1 cm. Lower case letters (a, b, c) indicate significantly different groups ( $P<0.05$ ).

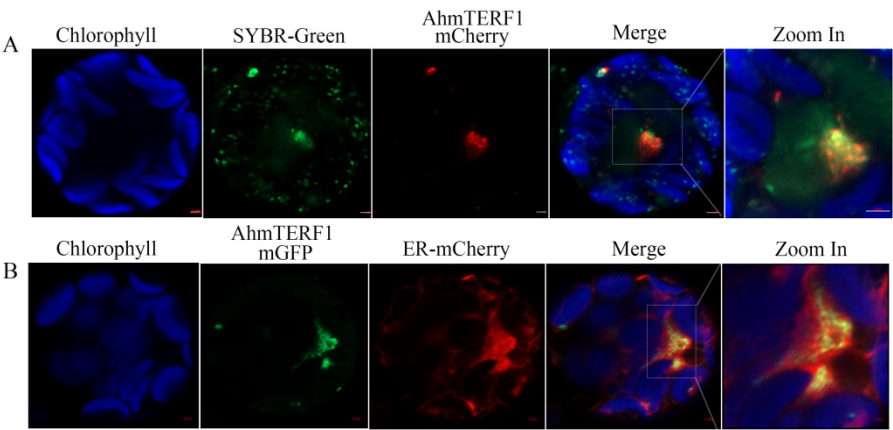

Supplemental Figure S3. AhmTERF1 co-localizes with mtDNA and ER.

A: AhmTERF1 co-localizes with mtDNA. B. AhmTERF1 co-localizes with ER.

Supplemental Table S1. Primers used in this study.

| Primer          | Sequence                                       |
|-----------------|------------------------------------------------|
| AhmTERF1-qF     | CATCCACACCACCATTTTCCTTCCA                      |
| AhmTERF1-qR     | GACCCATTTGTGCCAGATTTTGCCT                      |
| AhmTERF1-GFP-F  | CTGTACAAGCGGTACCCCGGGATGAAAACTTCATCTTCTCTTCATC |
| AhmTERF1-GFP-R  | GTCCTAGGCTACGTAGGATCCTCAACTCGAATTCTTTTTTCAG    |
| pAhmTERF1-Gus-F | GATAAGCTTGATATCGAATTCTCTAGTTAAACTTATTTTGGTCTGC |
| pAhmTERF1-Gus-R | AAGGGACTGTCTAGAACTAGTAGTTGTAGACTTGTAGTGGACCACA |
| Arahy.U6ZXMA -F | CAGTTGTTGTTCCACCTGACATTGA                      |
| Arahy.U6ZXMA -R | GCCAAGATGTCCTATTCTGAAAACC                      |
| atp9 -F         | ATGTTAGAAGGTGCAAAATCAATGG                      |
| atp9-R          | GAAAACAAAGAGAATCAGAAAGGCC                      |

|         |                           |
|---------|---------------------------|
| RRN18-F | AAGTTGGAATCGCTAGTAATCG    |
| RRN18-R | TCCCCTACGGCTACCTTGTTACGAC |
| RRN26-F | AGACGAAAGTCGGCCATAGTGATCC |
| RRN26-R | TTCAACCCCAGGATGTGATGAGTCG |

---
